# Supplementary material for: ERG function in prostate cells is regulated by distinct positive feedback loops depending on AKT signaling status
Source: Research Square preprint supplement (doi:10.21203/rs.3.rs-9941989/v1), 2026-06-15
Supplement: Supplementary file 1 [file 539c6bf1f9a87ab7c01aeef6.pdf]

**Supplemental Table 1. DNA oligonucleotide sequences.**

| Oligonucleotide name | Sequence                 |
|----------------------|--------------------------|
| KRT5 RT-qPCR F       | CCAAGGTTGATGCACTGATGG    |
| KRT5 RT-qPCR R       | TGTCAGAGACATGCGTCTGC     |
| KRT8 RT-qPCR F       | TCCATCAGGGTGACTCAGAAA    |
| KRT8 RT-qPCR R       | CCAGCTTCAAGGGGCTCAA      |
| TACSTD2 RT-qPCR F    | AGACCAAAGCCTGCGCTGCG     |
| TACSTD2 RT-qPCR R    | AGCTGGGGTGCAGCTTGTAG     |
| TCN2 RT-qPCR F       | TGAACCACAAGACCTACATTGATC |
| TCN2 RT-qPCR R       | GTGAATCCTCCTAACTCATGGG   |
| KRT18 RT-qPCR F      | TGCCAGCTCTGGGTTGACCG     |
| KRT18 RT-qPCR R      | TGTGGTGCTCTCCTCAATCTGCTG |
| ALDH1A1 RT-qPCR F    | ATGGATGCTTCCGAGAGG       |
| ALDH1A1 RT-qPCR R    | GCCACATACACCAATAGGTTC    |
| OCT4 RT-qPCR F       | AGAACATGTGTAAGCTGCGG     |
| OCT4 RT-qPCR R       | GTTGCCTCTCACTCGGTTC      |
| CDH1 RT-qPCR F       | GAACGCATTGCCACATACAC     |
| CDH1 RT-qPCR R       | ATTCGGGCTTGTTGTCATTC     |
| CDH2 RT-qPCR F       | ATCCTACTGGACGGTTTCG      |
| CDH2 RT-qPCR R       | TTGGCTAATGGCACTTGA       |
| VIM RT-qPCR F        | CGCCATCAACACCGAGTTC      |
| VIM RT-qPCR R        | ATCTTATTCTGCTGCTCCAGGAA  |
| FN RT-qPCR F         | CCATCGCAAACCGCTGCCAT     |
| FN RT-qPCR R         | AACACTTCTCAGCTATGGGCTT   |
| AR RT-qPCR F         | GGCGGGCCAGGAAAGCGACT     |
| AR RT-qPCR R         | TCCCTGGCAGTCTCCAAACGCAT  |

Supplemental Table S2 Cluster marker gene expression

| Cluster | Gene    | Log2 Fold Change | Adj P-value |
|---------|---------|------------------|-------------|
| 2       | KRT18   | 0.81             | 1.3e-54     |
| 2       | KRT8    | 0.43             | 8.6e-8      |
| 7       | KRT5    | 0.85             | 2.4e-69     |
| 7       | TP63    | 1.49             | 1.9e-29     |
| 4       | VIM     | 2.36             | 6.0e-158    |
| 4       | CDH2    | 3.66             | 2.1e-101    |
| 4       | FN1     | 0.95             | 1.3e-13     |
| 9       | TACSTD2 | 2.60             | 2.2e-17     |
| 9       | CXCL17  | 3.77             | 6.2e-3      |
| 9       | KLK10   | 4.22             | 4.0e-58     |
| 9       | KLK8    | 4.02             | 1.0e-34     |
| 9       | KLK5    | 3.85             | 2.6e-28     |
